# Supplementary material for: Patients with sporadic FTLD exhibit similar increases in lysosomal proteins and storage material as patients with FTD due to GRN mutations
Source: PubMed Central journal article supplement (PMC10148425; doi:10.1186/s40478-023-01571-4), 2023-04-28
Supplement: 40478_2023_1571_MOESM1_ESM.pdf [file 40478_2023_1571_MOESM1_ESM.pdf]

## Low Molecular Weight GCase

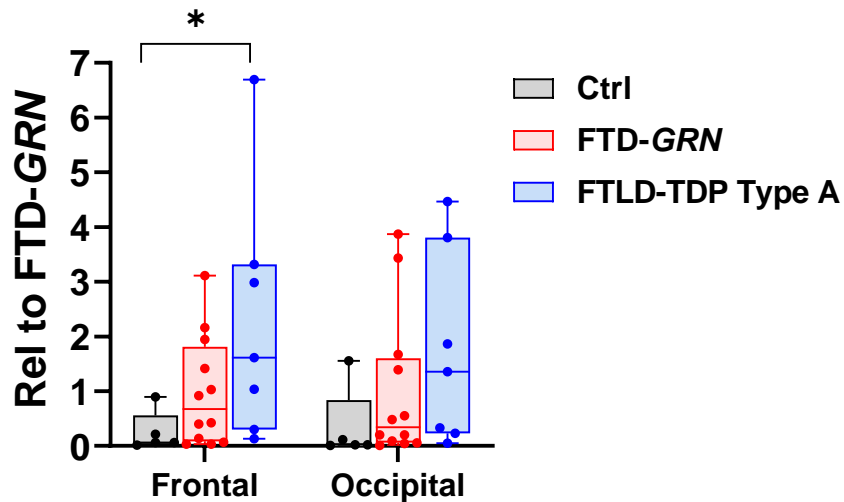

**Figure S1 – Quantitation of Low Molecular Weight GCase.** Levels of low molecular weight GCase were elevated in frontal cortex of patients with FTLD-TDP type A versus controls (ANOVA,  $p = 0.0413$ ), with a similar non-significant trend in occipital cortex (ANOVA,  $p = 0.0755$ ) cortex.  $n = 5$  controls, 12 patients with FTD-GRN, and 7 patients with sporadic FTLD-TDP type A. \* =  $p < 0.05$  by Fisher's LSD post-hoc test. The low molecular weight GCase band is denoted with a red arrow on the blots in Fig. 1.

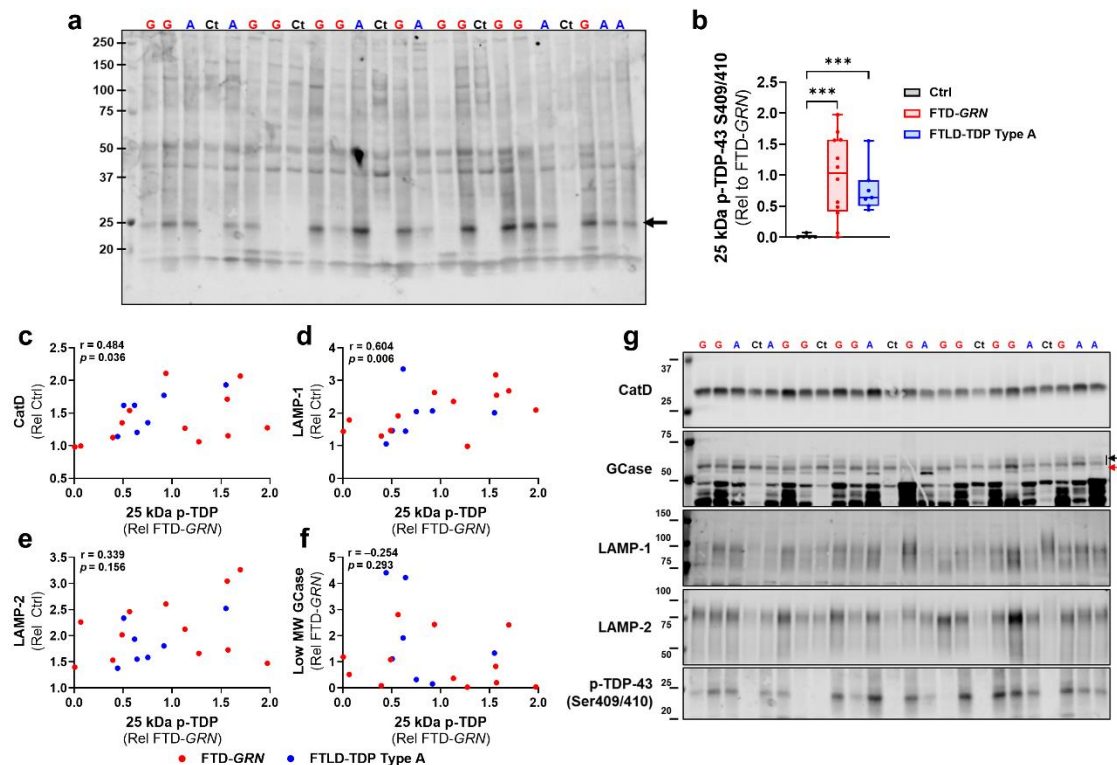

**Figure S2 – Correlation of Triton-insoluble 25 kDa p-TDP-43 with Levels of Lysosomal Proteins.**

**a**, Immunoblot of the triton-insoluble pellets of the samples used for assessment of lysosomal enzyme activity and protein levels revealed a roughly 25 kDa p-TDP-43 (Ser409/410) band (shown by arrow). **b**, Levels of 25 kDa p-TDP-43 were significantly higher in patients with FTD-GRN or sporadic FTLD-TDP type A than in controls (ANOVA,  $p = 0.0002$ ), but did not differ between FTLD patient groups. **c–f**, We therefore analyzed the correlation of 25 kDa p-TDP-43 with levels of the lysosomal proteins that were increased in FTLD patient groups. These analyses revealed significant correlation of 25 kDa p-TDP-43 with CatD (**c**) and LAMP-1 (**d**), with a similar trend for LAMP-2 (**e**). Levels of low molecular weight GCcase did not exhibit a clear relationship with levels of 25 kDa p-TDP-43 (**f**). In **g**, the 25 kDa p-TDP-43 band is shown aligned with matching CatD, GCcase, LAMP-1, and LAMP-2 bands from Fig. 1e. In **a** and **g**, Ct = control, G = FTD-GRN, and A = sporadic FTLD-TDP type A. Molecular weight markers are identified by weight in kDa. In **c–f**, Spearman  $r$  and  $p$  values are shown on each graph. \*\*\* =  $p < 0.001$  by Fisher's LSD post-hoc test.  $n = 5$  controls, 12 patients with FTD-GRN, and 7 patients with sporadic FTLD-TDP type A.

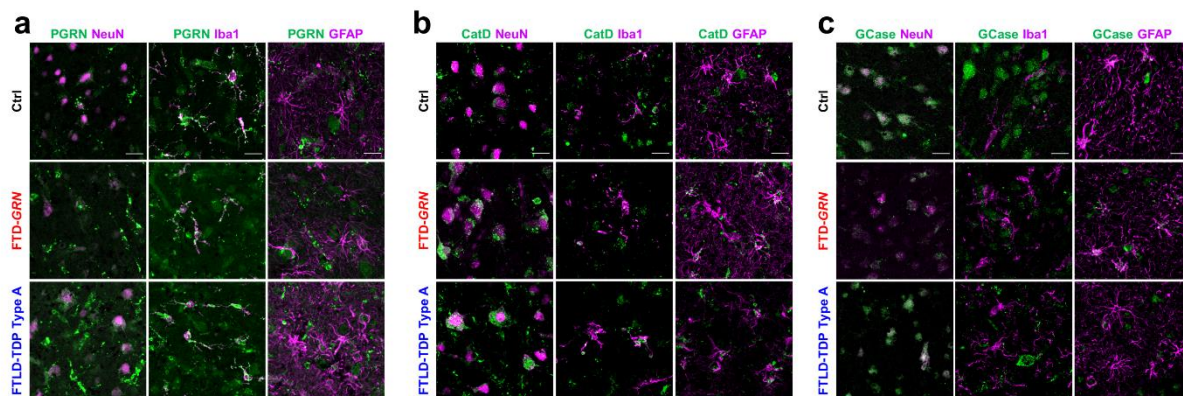

**Figure S3 – Progranulin, Cathepsin D, and GCCase labeling by cell type.** Co-immunostaining for lysosomal proteins (**a**, progranulin (PGRN), **b**, cathepsin D (CatD), and **c** GCCase ( $\beta$ -glucocerebrosidase) and markers for neurons (NeuN), microglia (Iba1), and astrocytes (GFAP). All scale bars represent 20  $\mu$ m.

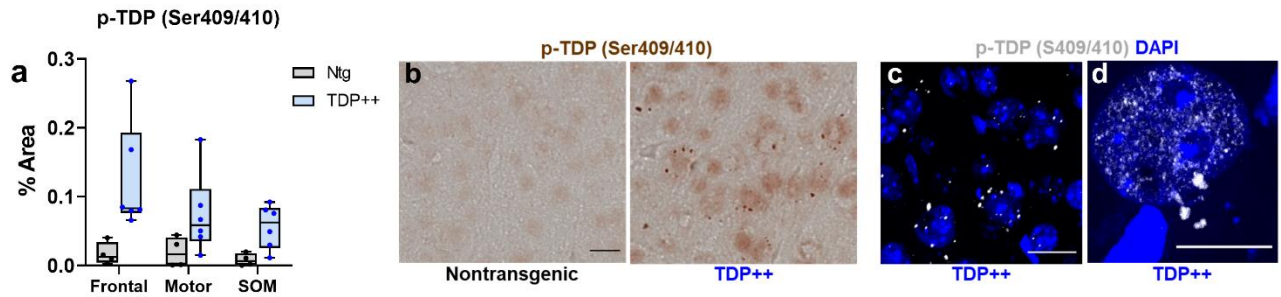

**Figure S4 – Confirmation of TDP-43 aggregation in TDP-43 transgenic mice.**

**a,b**, Homozygous TDP-43 transgenic mice (TDP++) exhibited p-TDP-43 (Ser409/410)-immunoreactive aggregates throughout the cortex by 21 days of age (RM ANOVA effect of TDP,  $p = 0.0113$ ,  $n = 4-6$  mice per genotype). **c,d**, Immunofluorescence for p-TDP (Ser409/410) confirmed that these TDP-43 aggregates are cytoplasmic. Scale bars in **b** and **c** represent 20  $\mu\text{m}$ , and the scale bar in **d** represents 10  $\mu\text{m}$ . SOM = somatosensory cortex.

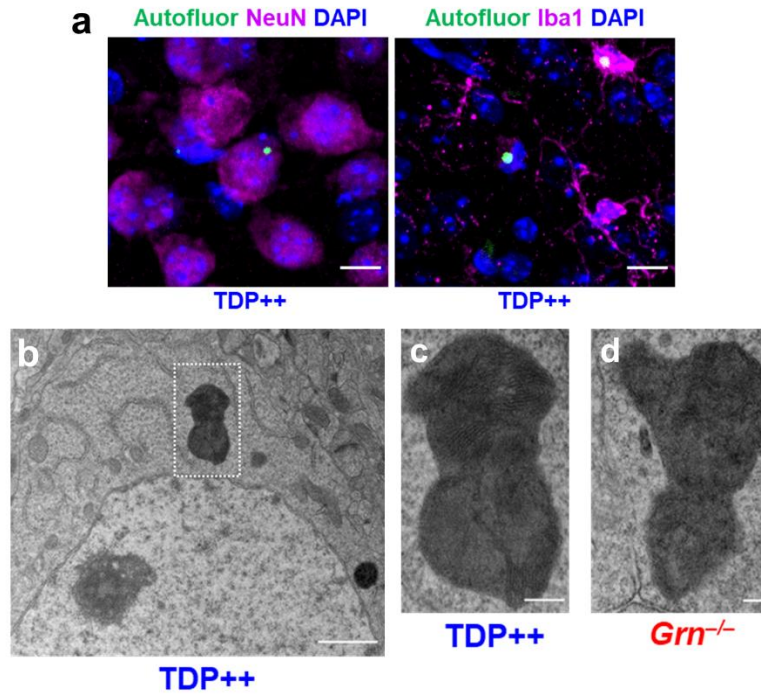

**Figure S5 – Further analysis of storage material in TDP-43 transgenic mice.**

**a**, Autofluorescent storage material was present in both neurons and microglia of homozygous TDP-43 transgenic mice (TDP++). **b,c**, Electron microscopy of TDP++ cortex revealed storage deposits with the typical fingerprint profile of lipofuscin [90], **d**, which were similar in appearance to storage material from cortex of *Grn*<sup>-/-</sup> mice. Scale bars represent 10  $\mu$ m in **a**, 1  $\mu$ m in **b**, and 200 nm in **c** and **d**.

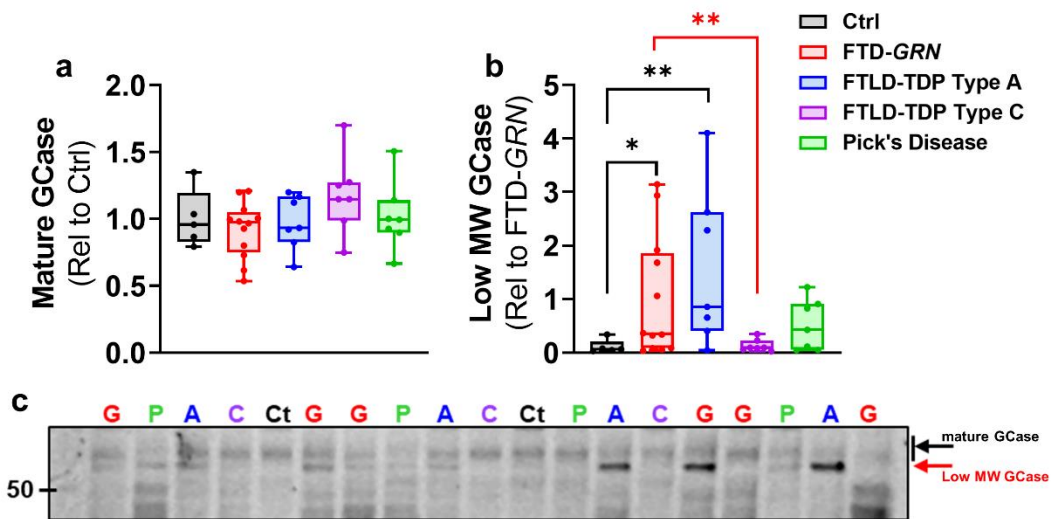

**Figure S6 – GCCase Levels in Patients with Multiple FTLD Subtypes.**

**a**, GCCase immunoblots revealed no significant group differences in mature GCCase (ANOVA,  $p = 0.2567$ ). **b**, Patients with FTD-GRN or sporadic FTLD-TDP type A had higher levels of immature, low molecular weight GCCase (ANOVA,  $p = 0.0181$ ). Patients with FTLD-TDP type C did not have higher levels of low molecular weight GCCase than controls, and had significantly lower levels of low molecular weight GCCase than patients with FTD-GRN. Patients with Pick's disease had intermediate levels of low molecular weight GCCase, as they did not significantly differ from controls (Fisher's post-hoc test,  $p = 0.118$ ) but also did not differ from patients with FTD-GRN. \* =  $p < 0.05$ , \*\* =  $p < 0.01$  by Fisher's LSD post-hoc test. Black lines and symbols indicate difference from control. Red lines and symbols indicate difference from FTD-GRN. Abbreviations for **c** are: Ct = control, G = FTD-GRN, A = FTLD-TDP type A, C = FTLD-TDP type C, P = Pick's disease.  $n = 5$  controls, 12 patients with FTD-GRN, 7 patients with FTLD-TDP type A, 7 patients with FTLD-TDP type C, and 7 patients with Pick's disease.



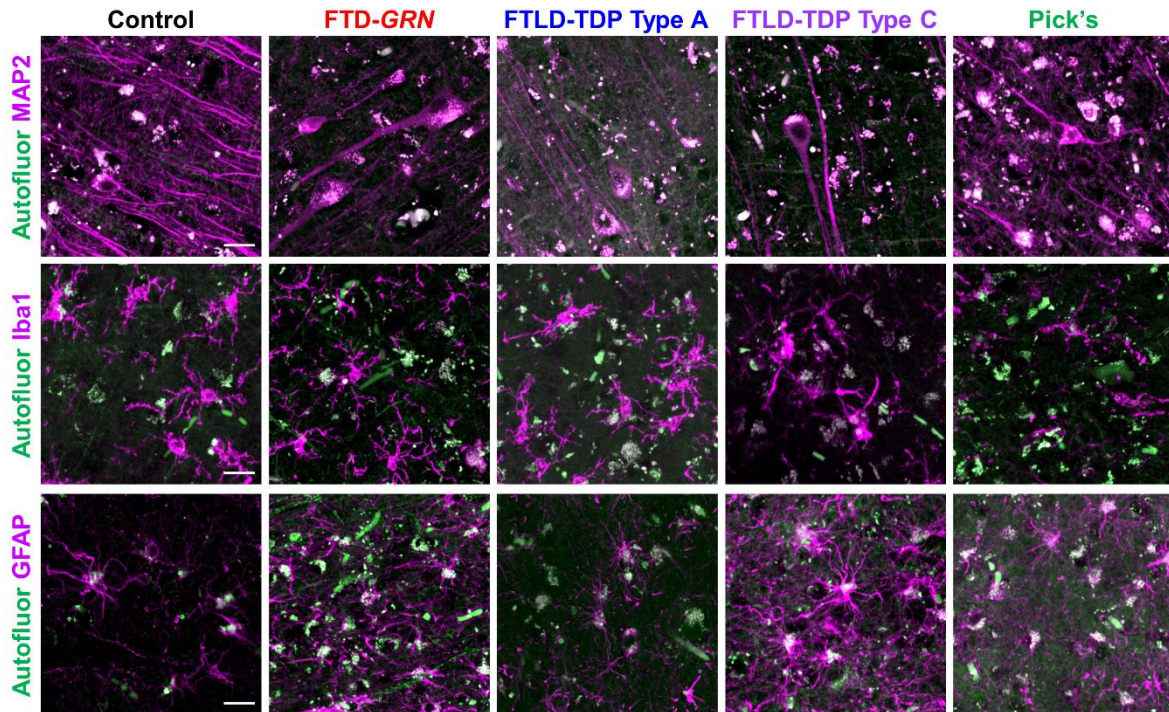

**Figure S7 – Cellular distribution of autofluorescent storage material in frontal cortex.** Colocalization of autofluorescence and markers of neurons (MAP2), microglia (Iba1), and astrocytes (GFAP) revealed that all cell types carried some autofluorescent storage material. Scale bars represent 20  $\mu$ m.
